# Supplementary material for: Timoshenko Beam Theory Exact Solution For Bending, Second-Order Analysis, and Stability
Source: Preprints.org preprint supplement (doi:10.20944/preprints202011.0457.v2), 2021-04-05
Supplement: Supplementary file 1 [file Spreadsheet S1.xlsx]

## Sheet: Feuil1
			Beam simply supported at its ends subjected to a uniformly distributed load
		b=	0.3	m
		H=	0.5	m	I = bh3/12 =	0.003125	m4														h=	2	m
		A=	0.15	m²
		E=	34500000	kN/m²	G=E/2/(1+n)=	1.32692e+07	kN/m²														Nh²/EI=	0.2
		k =	0.833333																		a= EI/GASh²=	0
		n =	0.3
		Beam length	l=	10	m
		Uniformly distributed load	p=	10	kN/m
		bending shear factor	a= EI/kGAl²=	0.00065
			Deflection calculation with the present study
			x=	W = EI ´ w	w =
		w1	0	0	0
		w2	1	411.675	0.00381843
		w3	2	778.533	0.00722118
		w4	3	1065.58	0.00988359
		w5	4	1247.8	0.0115738
		w6	5	1310.21	0.0121527
		w7	6	1247.8	0.0115738
		w8	7	1065.57	0.00988359
		w9	8	778.533	0.00722118
		w10	9	411.675	0.00381843
		w11	10	0	0
			Deflection calculation with the flexibility method
			x=	w =
		w1	0	0
		w2	1	0.00381843
		w3	2	0.00722118
		w4	3	0.00988359
		w5	4	0.0115738
		w6	5	0.0121527
		w7	6	0.0115738
		w8	7	0.00988359
		w9	8	0.00722118
		w10	9	0.00381843
		w11	10	0
