# Supplementary material for: Timoshenko Beam Theory Exact Solution For Bending, Second-Order Analysis, and Stability
Source: Preprints.org preprint supplement (doi:10.20944/preprints202011.0457.v2), 2021-04-05
Supplement: Supplementary file 2 [file Spreadsheet S2.xlsx]

## Sheet: Feuil1
			Beam length L=	8	m
			Distance a =	5	m
			Distance b =	3	m
			Concentrated load P=	10	kN
			a= EI/kGAl²=	0.15
		A1	B1	C1	D1	A2	B2	C2	D2
	Equation (C4)	0	0	0	1	0	0	0	0		0
	Equation (C5)	-9.6	0	1	0	0	0	0	0		0
	Equation (C6)	-20.8333	-12.5	5	1	0	0	0	-1		0
	Equation (C7)	-22.1	-5	1	0	9.6	0	-1	0		0
	Equation (C8)	5	1	0	0	0	-1	0	0		0
	Equation (C9)	1	0	0	0	-1	0	0	0		10
	Equation (C10)	0	0	0	0	3	1	0	0		0
	Equation (C11)	0	0	0	0	-4.5	-4.5	3	1		0
	Solving of the 8 ´ 8 linear equation system:
	A1	4.86126			Fixed-end moment MFEM = B1 =	-8.89009	kNm
	B1	-8.89009			Moment under the load M6 = B2 =	15.4162	kNm
	C1	46.6681
	D1	0
	A2	-5.13874
	B2	15.4162
	C2	-65.6472
	D2	243.19
	a= EI/kGAl² =	0	0.025	0.05	0.075	0.1	0.125	0.15
	M FEM =	-12.8906	-11.9913	-11.2092	-10.523	-9.91587	-9.375	-8.89009
	M6 =	13.916	14.2533	14.5465	14.8039	15.0316	15.2344	15.4162
		The exact values are determined with the flexibility method:
	Equation (B12)
	Equation (B13)
	a= EI/kGAl² =	0	0.025	0.05	0.075	0.1	0.125	0.15
	M FEM =	-12.8906	-11.9913	-11.2092	-10.523	-9.91587	-9.375	-8.89009
	M6 =	13.916	14.2533	14.5465	14.8039	15.0316	15.2344	15.4162
