# Supplementary material for: Timoshenko Beam Theory Exact Solution For Bending, Second-Order Analysis, and Stability
Source: Preprints.org preprint supplement (doi:10.20944/preprints202011.0457.v2), 2021-04-05
Supplement: Supplementary file 3 [file Spreadsheet S3.xlsx]

## Sheet: Feuil1
Compressive force with ka > -1
a= EI/kGAl²=	0.25
k =	-2.84685	® ka =	-0.711714			k=	determinant
x1=	3.14247		determinant =	0.000873823		-1
			b =	1.86195		-3
						-4
						-5
	A1	B1	NlC1	ND1		-9
Nw(x=0) = 0	-1	0	0	1		-11
M(x=0) = 0	1	0	0	0
M(x=l) = 0	-1	-0.000873823	0	0					a= EI/kGAl² =	0	0.025	0.05	0.075	0.1	0.125	0.15	0.2	0.25
Nw(x=l) = 0	1	0.000873823	1	1					b =	1	1.11658	1.22208	1.31917	1.4096	1.49456	1.57494	1.72451	1.8621
									k=	-9.8696	-7.91633	-6.60846	-5.67147	-4.96719	-4.4185	-3.97897	-3.31872	-2.8464
									ka=	0	-0.197908	-0.330423	-0.42536	-0.496719	-0.552312	-0.596846	-0.663744	-0.7116
	A1	B1	NlC1	ND1
Nw(x=0) = 0	-1	0	0	1
M(x=0) = 0	1	0	0	0
M(x=l) = 0	cosx1	sinx1	0	0
Nw(x=l) = 0	-cosx1	-sinx1	1	1
