# Supplementary material for: Timoshenko Beam Theory Exact Solution For Bending, Second-Order Analysis, and Stability
Source: Preprints.org preprint supplement (doi:10.20944/preprints202011.0457.v2), 2021-04-05
Supplement: Supplementary file 4 [file Spreadsheet S4.xlsx]

## Sheet: Feuil1
Compressive force with ka > -1
a= EI/kGAl²=	0.15
k =	-4.71142	® ka =	-0.706713			k=	determinant
x1=	4.00801		determinant =	-0.000813416		-1
x2=	1.1755		b =	1.44735		-2
						-4
						-5
	A1	B1	NlC1	ND1		-15
Nw(x=0) = 0	-1	0	0	1		-20
Nj(x=0) = 0	0	-1.1755	1	0					a= EI/kGAl² =	0	0.025	0.05	0.075	0.1	0.125	0.15	0.2	0.25
M(x=l) = 0	-0.647557	-0.762017	0	0					b =	0.699156	0.871558	1.0146	1.1392	1.251	1.353	1.4474
Nw(x=l) = 0	0.647557	0.762017	1	1					k=	-20.1907	-12.9929	-9.5876	-7.60501	-6.30645	-5.39143	-4.7111	#DIV/0!	#DIV/0!
									ka=	0	-0.324824	-0.47938	-0.570376	-0.630645	-0.673929	-0.706665	#DIV/0!	#DIV/0!
	A1	B1	NlC1	ND1
Nw(x=0) = 0	-1	0	0	1
Nj(x=0) = 0	0	-x2	1	0
M(x=l) = 0	cosx1	sinx1	0	0
Nw(x=l) = 0	-cosx1	-sinx1	1	1
