# Supplementary material for: Timoshenko Beam Theory Exact Solution For Bending, Second-Order Analysis, and Stability
Source: Preprints.org preprint supplement (doi:10.20944/preprints202011.0457.v2), 2021-04-05
Supplement: Supplementary file 5 [file Spreadsheet S5.xlsx]

## Sheet: Feuil1
Compressive force with ka > -1
a= EI/kGAl²=	0.025
k =	-2.32399	® ka =	-0.0580997			k=	determinant
x1=	1.57078		determinant =	-2.95798e-05		-1
x2=	1.47951		b =	2.06079		-1.5
						-2
						-5
	A1	B1	NlC1	ND1
Nw(x=0) = 0	-1	0	0	1
Nj(x=0) = 0	0	-1.47951	1	0					a= EI/kGAl² =	0	0.025	0.05	0.075	0.1	0.125	0.15	0.2	0.25
M(x=l) = 0	1.99929e-05	1	0	0					b =	2	2.06076	2.11978	2.1772	2.23315	2.28773	2.34103	2.44416	2.54311
l´T(x=l) = 0	0	0	1	0					k=	-2.4674	-2.32404	-2.19643	-2.0821	-1.97908	-1.88578	-1.80088	-1.65212	-1.52605
									ka=	0	-0.0581011	-0.109821	-0.156157	-0.197908	-0.235722	-0.270132	-0.330423	-0.381514
	A1	B1	NlC1	ND1
Nw(x=0) = 0	-1	0	0	1
Nj(x=0) = 0	0	-x2	1	0
M(x=l) = 0	cosx1	sinx1	0	0
l´T(x=l) = 0	0	0	1	0
