# Supplementary material for: Timoshenko Beam Theory Exact Solution For Bending, Second-Order Analysis, and Stability
Source: Preprints.org preprint supplement (doi:10.20944/preprints202011.0457.v2), 2021-04-05
Supplement: Supplementary file 6 [file Spreadsheet S6.xlsx]

## Sheet: Feuil1
Compressive force with ka > -1
a= EI/kGAl²=	0.15
k =	-5.88246	® ka =	-0.882368			k=	determinant
x1=	7.0716		determinant =	-6.78484e-05		-1	-0.23
x2=	0.831843		b =	1.2953		-3	-3.16
						-3.5	-4.24
						-4	-5.09
	A1	B1	NlC1	ND1		-4.5	-5.24
Nw(x=0) = 0	-1	0	0	1		-5	-3.98
Nj(x=0) = 0	0	-0.831843	1	0		-5.5	-1.04
Nw(x=l) = 0	-0.704974	-0.709233	1	1		-6	-0.78
Nj(x=l) = 0	0.589971	-0.586428	1	0
									a= EI/kGAl² =	0	0.025	0.05	0.075	0.1	0.125	0.15	0.2	0.25
									b =	0.499998	0.704798	0.862253	0.995094	1.11218	1.19376	1.2953
									k=	-39.4787	-19.8688	-13.2749	-9.96716	-7.97906	-6.92579	-5.88246	#DIV/0!	#DIV/0!
									ka=	0	-0.496719	-0.663744	-0.747537	-0.797906	-0.865724	-0.882368	#DIV/0!	#DIV/0!
	A1	B1	NlC1	ND1
Nw(x=0) = 0	-1	0	0	1
Nj(x=0) = 0	0	-x2	1	0
Nw(x=l) = 0	-cosx1	-sinx1	1	1
Nj(x=l) = 0	x2sinx1	-x2cosx1	1	0
