# Supplementary material for: Timoshenko Beam Theory Exact Solution For Bending, Second-Order Analysis, and Stability
Source: Preprints.org preprint supplement (doi:10.20944/preprints202011.0457.v2), 2021-04-05
Supplement: Supplementary file 7 [file Spreadsheet S7.xlsx]

## Sheet: Feuil1
	Compressive force with ka > -1									Buckling factors depending on the bending shear factor
							a= EI/kGAl² =	0	0.025	0.05	0.075	0.1	0.125	0.15	0.2	0.25
							b =	1	1.11658	1.22208	1.31917	1.4096	1.49456	1.57494	1.72451	1.8621
							k=	-9.8696	-7.91633	-6.60846	-5.67147	-4.96719	-4.4185	-3.97897	-3.31872	-2.8464
							ka=	0	-0.197908	-0.330423	-0.42536	-0.496719	-0.552312	-0.596846	-0.663744	-0.7116
	Tension force or a compressive force with ka < -1
						SUMMARY OF THE RESULTS
	a =	0.025
	k =	-7.5	-6	-5	-4	-3	-2	-1	0	1	2	3	4
	x1 ,x3 =	3.03822	2.65684	2.39046	2.10819	1.8009	1.45095	1.01274		0.98773	1.38013	1.67054	1.90693
	MMP /pl² =	2.44743	0.527755	0.345255	0.256056	0.203213	0.168285	0.143496	0.125	0.110676	0.0992609	0.0899526	0.0822194
	a =	0.05
	k =	-6.5	-6	-5	-4	-3	-2	-1	0	1	2	3	4
	x1 ,x3 =	3.10316	2.9277	2.58199	2.23607	1.87867	1.49071	1.02598		0.9759	1.3484	1.61515	1.82574
	MMP /pl² =	7.85359	1.39472	0.524204	0.321492	0.231329	0.180414	0.147735	0.125	0.10828	0.0954735	0.0853542	0.0771592
	a =	0.075
	k =	-7	-5.5	-5	-4	-3	-2	-1	0	1	2	3	4
	x1 ,x3 =		3.05969	2.82843	2.39046	1.96748	1.53393	1.03975		0.964486	1.31876	1.56492	1.75412
	MMP /pl² =		4.25928	1.08251	0.431569	0.268445	0.194425	0.152231	0.125	0.105985	0.0919643	0.0812022	0.0726839
	a =	0.1
	k =	-7	-6	-4.5	-4	-3	-2	-1	0	1	2	3	4
	x1 ,x3 =			2.86039	2.58199	2.0702	1.58114	1.05409		0.953463	1.29099	1.51911	1.69031
	MMP /pl² =			1.3635	0.655255	0.319696	0.210792	0.15701	0.125	0.103786	0.0887036	0.0774347	0.0686979
	a =	0.125
	k =	-7	-6	-5	-4	-3	-2	-1	0	1	2	3	4
	x1 ,x3 =				2.82843	2.19089	1.63299	1.06904		0.942809	1.26491	1.4771	1.63299
	MMP /pl² =				1.35314	0.395024	0.230163	0.162099	0.125	0.101676	0.0856661	0.0740009	0.0651254
	a =	0.15
	k =	-7	-6	-5	-3.5	-3	-2	-1	0	1	2	3	4
	x1 ,x3 =				2.71448	2.3355	1.69031	1.08465		0.932505	1.24035	1.43839	1.58114
	MMP /pl² =				1.06241	0.516522	0.253448	0.167528	0.125	0.0996499	0.0828296	0.0708583	0.0619055
	a = 0.025		a = 0.05		a = 0.075		a = 0.10
	k =	MMP /pl² =	k =	MMP /pl² =	k =	MMP /pl² =	k =	MMP /pl² =
	-7.5	2.44743	-6.5	7.85359
	-6	0.527755	-6	1.39472	-5.5	4.25928
	-5	0.345255	-5	0.524204	-5	1.08251
	-4	0.256056	-4	0.321492	-4	0.431569	-4.5	1.3635
	-3	0.203213	-3	0.231329	-3	0.268445	-4	0.655255
	-2	0.168285	-2	0.180414	-2	0.194425	-3	0.319696
	-1	0.143496	-1	0.147735	-1	0.152231	-2	0.210792
	0	0.125	0	0.125	0	0.125	-1	0.15701
	1	0.110676	1	0.10828	1	0.105985	0	0.125
	2	0.0992609	2	0.0954735	2	0.0919643	1	0.103786
	3	0.0899526	3	0.0853542	3	0.0812022	2	0.0887036
	4	0.0822194	4	0.0771592	4	0.0726839	3	0.0774347
