# Supplementary material for: Timoshenko Beam Theory Exact Solution For Bending, Second-Order Analysis, and Stability
Source: Preprints.org preprint supplement (doi:10.20944/preprints202011.0457.v2), 2021-04-05
Supplement: Supplementary file 8 [file Spreadsheet S8.xlsx]

## Sheet: Compression
Compressive force with ka > -1
a= EI/kGAl²=	0.05
k =	-6	® ka =	-0.3
x1=	2.9277
x2=	2.04939
l=	8	m	Load P =from a distance a from the left end
a=	5	m
b=	3	m
P=	10	kN
	A1	B1	NC1	ND1	A2	B2	NC2	ND2
Nw(x1=0) = 0	-1	0	0	1	0	0	0	0	0
Nj(x1=0) = 0	0	-2.04939	8	0	0	0	0	0	0
w(x1 = a) = w(x2 = 0)	0.25613	-0.966642	5	1	1	0	0	-1	0
j(x1 = a) = j(x2 = 0)	1.98103	0.52491	8	0	0	2.04939	-8	0	0
M (x1=a) = M(x2=0)	-0.25613	0.966642	0	0	-1	0	0	0	0			a= EI/kGAl² =	0	0.025	0.05	0.075	0.1	0.125	0.15
T (x1=a) - T (x2=0) = P	0	0	1	0	0	0	-1	0	10			b =	0.699156	0.871558	1.0146	1.1392	1.251	1.353	1.4474
M(x2 = b) = 0	0	0	0	0	0.455478	0.890247	0	0	0			k=	-20.1907	-12.9929	-9.5876	-7.60501	-6.30645	-5.39143	-4.7111
Nw(x2 = b) = 0	0	0	0	0	-0.455478	-0.890247	3	1	0			ka=	0	-0.324824	-0.47938	-0.570376	-0.630645	-0.673929	-0.706665
	A1	-29.2791		MFEM=	-29.2791	kNm	Fixed-end moment
	B1	28.9252		MuL =	35.4596	kNm	Moment under the load
	NC1	7.40989
	ND1	-29.2791
	A2	35.4596
	B2	-18.1422
	NC2	-2.59011
	ND2	7.77034

## Sheet: Tension
Example 4
Tensile force
a= EI/kGAl²=	0.05
k =	6	® ka =	0.3
x3=	2.14834
x4=	2.79285
l=	8	m	Load P =from a distance a from the left end
a=	5	m
b=	3	m
P=	10	kN
	A1	B1	NC1	ND1	A2	B2	NC2	ND2
Nw(x1=0) = 0	-1	0	0	1	0	0	0	0	0
Nj(x1=0) = 0	0	-2.79285	8	0	0	0	0	0	0
w(x1 = a) = w(x2 = 0)	-2.04528	-1.78415	5	1	1	0	0	-1	0
j(x1 = a) = j(x2 = 0)	-4.98285	-5.71216	8	0	0	2.79285	-8	0	0
M (x1=a) = M(x2=0)	2.04528	1.78415	0	0	-1	0	0	0	0			a= EI/kGAl² =	0	0.025	0.05	0.075	0.1	0.125	0.15	0.2	0.25
T (x1=a) - T (x2=0) = P	0	0	1	0	0	0	-1	0	10			b =	0.699156	0.871558	1.0146	1.1392	1.251	1.353	1.4474
M(x2 = b) = 0	0	0	0	0	1.34246	0.895649	0	0	0			k=	-20.1907	-12.9929	-9.5876	-7.60501	-6.30645	-5.39143	-4.7111	#DIV/0!	#DIV/0!
Nw(x2 = b) = 0:	0	0	0	0	-1.34246	-0.895649	3	1	0			ka=	0	-0.324824	-0.47938	-0.570376	-0.630645	-0.673929	-0.706665	#DIV/0!	#DIV/0!
	A1	-6.97828		MFEM=	-6.97828	kNm	Fixed-end moment
	B1	13.2403		MuL =	9.35017	kNm	Moment under the load
	NC1	4.62229
	ND1	-6.97828
	A2	9.35017
	B2	-14.0146
	NC2	-5.37771
	ND2	16.1331
