# Supplementary material for: Timoshenko Beam Theory Exact Solution For Bending, Second-Order Analysis, and Stability
Source: Preprints.org preprint supplement (doi:10.20944/preprints202011.0457.v2), 2021-04-05
Supplement: Supplementary file 9 [file Spreadsheet S9.xlsx]

## Sheet: 4x4 Compression and Tension
	4 x 4 second-order Element stiffness matrix
Compressive force with ka > -1
a= EI/kGAl²=	0.05
k =	-1.5
ka =	-0.075
L =	4	m
x1=	1.27343
x2=	1.17792
C = cosx1 =	0.293004
S = sinx1 =	0.956111
		Matrix 1					Matrix 1
		0	0	-1	0		-1	0	0	1
		1	0	0	0		0	-0.29448	1	0
		0	0	1	0		-0.293004	-0.956111	4	1
		-0.293004	-0.956111	0	0		0.281556	-0.086284	1	0
		0.0917264	0.230328	-0.0917264	0.230328
		0.230328	0.675922	-0.230328	0.245389
		-0.0917264	-0.230328	0.0917264	-0.230328
		0.230328	0.245389	-0.230328	0.675922
		D =	0.287768
		K11 =	5.87049	K11/L3 =	0.0917264
		K12 =	3.68524	K12/L2 =	0.230328
		K22 =	2.70369	K22/L =	0.675922
		K24 =	0.981556	K24/L =	0.245389
	4 x 4 Element stiffness matrix with Zheng-Ping Hu
				c = 1- P/(ksGA) =	0.925
					1.27343
					0.318357
		Matrix 1					Matrix 1
		0	0	0.101351	0		1	0	0	1
		0.101351	0	0	0		0	0.29448	1	0
		0	0	-0.101351	0		0.293004	0.956111	4	1
		-0.0296964	-0.0969032	0	0		-0.281556	0.086284	1	0
		0.0917264	0.230328	-0.0917264	0.230328
		0.230328	0.675922	-0.230328	0.245389
		-0.0917264	-0.230328	0.0917264	-0.230328
		0.230328	0.245389	-0.230328	0.675922
	Tensile force or compressive force with k <-1
a= EI/kGAl²=	0.05
k =	1.5
ka =	0.075
L =	4	m
x3=	1.18125
x4=	1.26984
C*= coshx3 =	1.78267
S*= sinhx3 =	1.47577
		Matrix 1					Matrix 1
		0	0	-1	0		-1	0	0	1
		1	0	0	0		0	-0.317461	1	0
		0	0	1	0		-1.78267	-1.47577	4	1
		-1.78267	-1.47577	0	0		-0.4685	-0.565927	1	0
		0.884985	1.47844	-0.884985	1.47844
		1.47844	4.68842	-1.47844	1.22534
		-0.884985	-1.47844	0.884985	-1.47844
		1.47844	1.22534	-1.47844	4.68842
